# Supplementary material for: Na+ Transporter SvHKT1;1 from a Halophytic Turf Grass Is Specifically Upregulated by High Na+ Concentration and Regulates Shoot Na+ Concentration
Source: MDPI journal article supplement (doi:10.3390/ijms21176100), 2020-08-24
Supplement: s1 [file s1]

Supplemental Table 1. Accession numbers for amino acid sequences of HKTs used for phylogenetic analysis

| HKT                 | Accession numbers |
|---------------------|-------------------|
| SvHKT1;1            | LC545616          |
| SvHKT2;1            | LC271218          |
| SvHKT2;2            | LC271219.1        |
| AtHKT1;1            | AK228564.1        |
| OsHKT1;1            | XP_015641242.1    |
| OsHKT1;3            | XP_015626193.1    |
| OsHKT1;4            | XP_015633970.1    |
| OsHKT1;5            | XP_015631953.1    |
| HvHKT1;1            | JF496205.1        |
| HvHKT1;5            | ABK58096.1        |
| GmHKT1A             | KRH25841.1        |
| GmHKT1B             | KRH55676.1        |
| GmHKT1C             | KRH74148.1        |
| VaHKT1B             | NC_028351.1       |
| SIHKT1;1            | HE962483.1        |
| SIHKT1;2            | HE962484.1        |
| McHKT1              | AAK52962.1        |
| McHKT1;2            | AAO73474.1        |
| PtHKT1;1            | XP_002325229.1    |
| EcHKT1;1            | AF176035.1        |
| EcHKT1;2            | AF176036.1        |
| SsHKT1              | AAS20529.2        |
| MtHKT1;5            | AES77170.2        |
| Ts(Es)HKT1;1        | JQ063120.1        |
| Ts(Es)HKT1;2        | BAJ34563.1        |
| CaHKT1;1            | AFH37929.1        |
| SiHKT1;1            | XM_014805535.2    |
| TaHKT1;5-D (TaHKT8) | ABG33949.1        |
| TaHKT8B             | ABG33947.1        |
| TmHKT1;5-A (TmHKT8) | ABG33946.1        |
| SbHKT6              | XP_002451638.1    |
| ZmHKT1              | AEK27028.1        |
| SbHKT1              | XM_002438915.2    |
| SbHKT7              | XP_002448492.2    |
| SpHKT1;1            | Tp6g07120*        |
| SpHKT1;2            | Tp6g07110*        |
| BdHKT1              | XP_003560515.1    |
| BdHKT6              | XP_003570995.1    |
| TaHKT2;1            | AAA52749.1        |
| HvHKT2;1            | AEM55590.1        |
| OsHKT2;1            | BAB61789.1        |

\* <http://thellungiella.org/blast/db/TpV84ORFs.protein>
